# Supplementary material
Source: PubMed Central journal article supplement (PMC4558363)
Supplement: NIHMS685493-supplement-supplement.pdf [file NIHMS685493-supplement-supplement.pdf]

## Supplementary Materials

### Image Acquisition:

An AGAR phantom was used to perform quality assurance of scanners across sites based on guidance and recommendations from the FBIRN initiative. Structural 3D T1-weighted images were acquired using an MPRAGE sequence (TR=2300ms, TE~3.0ms, TI=900 ms, 90 flip angle, FOV=256 x 240 mm, matrix=256 x 240, 1 mm isotropic voxels, 176 sagittal slices). Functional images sensitive to gradient-echo BOLD contrast were acquired using echo-planar imaging with the following parameters: (TR=2000ms, TE=30ms, 77o flip angle, FOV=220 x 220 mm, matrix=64 x 64, voxel size=3.4375 x 3.4375 x 4.0 mm, 32 axial-oblique slices approximately parallel with the anterior/posterior commissure with no interslice gap). A dual-echo gradient-echo scan was obtained to estimate magnetic field inhomogeneity (TR=500ms,  $\Delta$ TE=2.46, 55o flip angle, with same FOV, resolution, and slice thickness as the BOLD scans).

### Image Processing:

Pre-Processing - Brain volumes were extracted from full-head functional and structural images. Functional images were motion corrected (FSL's MCFLIRT) and high-pass filtered for frequencies below 200 s. Subjects with greater than 0.37 mm of mean relative frame-to-frame movement (representing greater than 3 standard deviations from the cohort mean) were excluded. Functional images were registered to each participant's MPRAGE using a rigid-body transformation (FSL's FLIRT). Functional images underwent B0 un-warping using the gradient-echo fieldmap estimates for each subject to correct for magnetic field inhomogeneity. Images were spatially smoothed with a Gaussian kernel (7mm FWHM, isotropic).

Modeling of subject-level fMRI data - Temporal autocorrelation of the fMRI time series was accounted for by pre-whitening (FSL's FILM). Activity associated with each event type was modeled by convolving a vector of expected neural activity with the 3 basis-function set of FMRIB's Linear Optimal Basis Sets (FLOBS). The first basis function represents a canonical hemodynamic response, while the other two effectively model delay and dispersion variability in the hemodynamic response, and are included to decrease error in first level GLM fit. However, only canonical response estimates were passed up to higher (group-level) analysis. For the encoding task, item-specific and relational encoding were modeled as separate event types, and non-response trials were also modeled as their own event. Item recognition had seven event types: hits and misses separately for "old" targets that underwent item-specific and relational encoding, correct rejections and false alarms for "new" foil items, and non-response trials. Analysis of response trials revealed that patients averaged at least 35 correct responses during item recognition, with the lowest number of correct responses occurring for one patient who had 19 correct responses following item-specific encoding. Response distributions were generally comparable for control subjects, who averaged at least 40 correct responses, with one control generating 25 correct responses, again following item-specific encoding. Associative recognition had three event types: hits (i.e., correctly identifying a "changed" or "unchanged" target pair), misses (i.e., incorrectly identifying a "changed" target pair as "unchanged" or vice versa), and non-response trials. Analysis of response trials revealed that controls averaged 19 correct responses, and patients averaged 18 correct responses, with the lowest number of correct responses occurring for one patient who had only 9 correct responses, and one control with only 8 correct

responses. It should be noted that, because of task design, there were only about half as many correct responses for the associative recognition as for the item recognition task, which may have reduced signal-to-noise (SNR) for detecting significant group fMRI differences in the associative recognition task. To better equate SNR, future studies may wish to double the number of associative recognition encoding and retrieval trials. However, because of time limitations, this was not possible in the current study.

Modeling of group-level fMRI data - We first examined *a priori* regions in prefrontal and medial temporal cortices, followed by exploratory whole-brain analyses. Regional analysis goals were two-fold: 1) to establish neural construct validity and, 2) to identify group differences. To establish construct validity, we ran contrasts to test for predicted activation within anatomically defined regions for the full sample (i.e., across the patient and control groups). Activated voxels within those regions were used as ROIs for subsequent one-sample and two-sample t-tests. Anatomical ROIs for the PFC were identified for the relational minus item encoding contrast for the full sample, with structural masks from the WFU\_PictAtlas (Maldjian et al., 2003) used to restrict activated voxels to left and right DLPFC [Brodmann areas (BA) 9, 46, and 9/46] and VLPFC (BA 44, 45 and 47). MTL ROIs were identified for the hit minus miss contrast during item recognition and associative recognition for the full sample, and structural masks from the Harvard Oxford Atlas identified boundaries for left and right HI and PHG. Within these PFC and MTL ROIs, one-sample t-tests were performed to confirm that the predicted effect was robust in controls and to examine activation effects in the patient group, and two-sample t-tests were performed to test for between-group differences. Resulting z (Gaussianized t) statistic images were subjected to a voxelwise

threshold of  $z > 2.3$ , and a corrected cluster mass significance threshold of  $p < 0.05$  based on Gaussian Random Field theory (Worsley, 2001) as implemented in FEAT.

Additionally, any effects outside of ROIs were explored using the FSL T1-image whole brain gray matter mask (values  $\geq 100$ ), using the same thresholding and cluster-correction procedures.

#### **fMRI Site Differences:**

Because this is a multi-site study, several metrics relevant to data quality were examined to determine if there were any site differences or site by group interactions. Absolute and relative movement, spatial smoothness, and a measure of temporal signal-to-noise (tSNR; Table 1), were entered into a two (group) by five (research site) by four (data quality variable) multi-variate analysis of variance (MANOVA). This revealed a main effect of site [ $F(4,99)=6.9, p<.0001$ ], but no effect of group [ $F(1,99)=0.3, p=.57$ ] or any group by site interactions [ $F(4,99)=2.0, p=.10$ ]. Site differences were present for absolute motion [ $F(4,104)=4.0, p<.005$ ], relative motion [ $F(4,104)=2.8, p<.05$ ], and tSNR parameters [ $F(4,104)=6.7, p<.0001$ ]. These site differences motivated our decision to include site as a covariate in the group-level GLM analyses.

**Table 1: fMRI Image Quality at Participating Research Sites**

|                 | <b>Baltimore</b> | <b>Davis</b> | <b>Minnesota</b> | <b>Rutgers</b> | <b>WashU</b> |
|-----------------|------------------|--------------|------------------|----------------|--------------|
| Sample Size     | 14 HC, 9 SZ      | 12 HC, 13 SZ | 13 HC, 12 SZ     | 6 HC, 3 SZ     | 12 HC, 15 SZ |
| Absolute Motion | 0.61 (.06)       | 0.36 (.04)   | 0.32 (.06)       | 0.46 (.06)     | 0.43 (.05)   |
| Relative Motion | 0.15 (.01)       | 0.10 (.01)   | 0.11 (.01)       | 0.11 (.01)     | 0.13 (.01)   |
| Smoothness      | 10.3 (.16)       | 10.5 (.15)   | 10.2 (.11)       | 10.2 (.66)     | 10.4 (.17)   |
| tSNR            | 188.7 (11.7)     | 243.6 (6.9)  | 241.9 (7.4)      | 195.7 (14.4)   | 221.3 (9.4)  |

**note:** HC = healthy controls, SZ = people with schizophrenia. Motion and smoothness measures are in mm. Values in parenthesis are SD. Absolute motion is computed relative to a fixed reference frame (middle time point of the run) and relative motion is computed from one frame to the next. Both are outputs of FSL's MCFLIRT tool for motion correction. Smoothness is the full-width half-maximum estimate of the spatial smoothness of the residuals from the first (subject) level GLM (obtained by converting the "resels" estimate from FSL's 'smoothest' function into units of mm). Temporal signal-to-noise (tSNR) for each run was obtained by first computing a spatial (voxel-wise) map of mean signal over time divided by the standard deviation of the residuals from the first level GLM. This tSNR map was then averaged over space using a weighted average according to the probability of gray matter at that voxel in MNI152 space. For all measures, values were averaged across the 3 runs for each subject and those subject-specific averages formed the basis for analysis of site and group effects (see main text for statistical analysis).

**Table 2:** Whole brain Activation During Relational Versus Item-specific Encoding in Healthy Comparison Subjects

| Cluster | Voxels | Z-value | X   | Y   | Z                    | Location                      | BA |
|---------|--------|---------|-----|-----|----------------------|-------------------------------|----|
| 1       | 3,866  | 6.5     | 44  | 38  | 8                    | Right Middle Frontal Gyrus    | 46 |
|         |        | 6.43    | 48  | 8   | 22                   | Right Inferior Frontal Gyrus  | 9  |
|         |        | 6.38    | 26  | 4   | 56                   | Right Sub-Gyral               | 6  |
|         |        | 4.44    | 36  | 22  | -6                   | Right Insula                  | 13 |
|         |        | 3.24    | 44  | 18  | -18                  | Right Inferior Frontal Gyrus  | 47 |
|         |        | 2.4     | 20  | 10  | 66                   | Right Medial Frontal Gyrus    | 6  |
| 2       | 8,779  | 9.22    | -46 | 6   | 24                   | Left Inferior Frontal Gyrus   | 44 |
|         |        | 8.93    | -24 | 6   | 52                   | Left Sub-Gyral                | 6  |
|         |        | 7.78    | -32 | -2  | 54                   | LeftPrecentral Gyrus          | 6  |
|         |        | 7.28    | -44 | 34  | 10                   | Left Middle Frontal Gyrus     | 46 |
|         |        | 7.02    | -42 | 32  | 18                   | Left Middle Frontal Gyrus     | 46 |
| 3       | 23,213 | 6.61    | -42 | 42  | -4                   | Left Inferior Frontal Gyrus   | 10 |
|         |        | 9.74    | -40 | -46 | 46                   | Left Inferior Parietal Lobule | 40 |
|         |        | 9.25    | -52 | -38 | 42                   | Left Inferior Parietal Lobule | 40 |
|         |        | 9.13    | -52 | -62 | -6                   | Left Middle Occipital Gyrus   | 19 |
|         |        | 9.06    | -22 | -66 | 44                   | Left Precuneus                | 7  |
|         |        | 8.21    | -10 | -68 | 54                   | Left Precuneus                | 7  |
|         | 8.09   | 50      | -58 | -12 | Right Fusiform Gyrus | 37                            |    |

**note:** BA = Brodmann Area; x, y and z coordinates are reported in Montreal Neurological Institute space. Significance threshold was set at  $Z = 2.3$  ( $p < .01$ ), cluster-corrected at  $p < .05$  for the total number of whole-brain voxels.

**Table 3:** Whole-brain Activation During Relational Versus Item-specific Encoding in Patients with Schizophrenia

| Cluster | Voxels | Z-value | X   | Y   | Z  | Location                      | BA |
|---------|--------|---------|-----|-----|----|-------------------------------|----|
| 1       | 4,797  | 7.13    | -24 | 6   | 54 | Left Sub-Gyral                | 6  |
|         |        | 7.04    | -50 | 8   | 26 | Left Inferior Frontal Gyrus   | 9  |
|         |        | 4.66    | -48 | 30  | 30 | Left Middle Frontal Gyrus     | 9  |
|         |        | 4.48    | -48 | 38  | 6  | Left Inferior Frontal Gyrus   | 46 |
|         |        | 4.44    | -48 | 44  | 2  | Left Inferior Frontal Gyrus   | 46 |
|         |        | 4.13    | -50 | 12  | 8  | Left Precentral Gyrus         | 44 |
| 2       | 14,429 | 7.04    | -52 | -68 | -8 | Left Middle Occipital Gyrus   | 37 |
|         |        | 7.02    | -40 | -46 | 46 | Left Inferior Parietal Lobule | 40 |
|         |        | 6.57    | -22 | -68 | 46 | Left Precuneus                | 7  |
|         |        | 6.36    | -36 | -84 | 24 | Left Middle Occipital Gyrus   | 19 |
|         |        | 6.35    | -34 | -84 | 28 | Left Superior Occipital Gyrus | 19 |
|         |        | 6.03    | -10 | -74 | 54 | Left Precuneus                | 7  |

**note:** BA = Brodmann Area; x, y and z coordinates are reported in Montreal Neurological Institute space. Significance threshold was set at  $Z = 2.3$  ( $p < .01$ ), cluster-corrected at  $p < .05$  for the total number of whole-brain voxels.

**Table 4.** Group Differences Between Patients With Schizophrenia and Healthy Comparison Subjects in Whole-brain Activation During Relational Versus Item-specific Encoding.

| Cluster | Voxels | Z-value | X  | Y   | Z   | Location         | BA |
|---------|--------|---------|----|-----|-----|------------------|----|
| 1       | 540    | 3.34    | 20 | -68 | -26 | Right Cerebellum | -- |
|         |        | 3.3     | 16 | -68 | -26 | Right Cerebellum | -- |
|         |        | 3.27    | 12 | -54 | -38 | Right Cerebellum | -- |
|         |        | 3.19    | 40 | -66 | -26 | Right Cerebellum | -- |
|         |        | 3.03    | 8  | -72 | -34 | Right Cerebellum | -- |
|         |        | 2.99    | 12 | -68 | -32 | Right Cerebellum | -- |

**note:** BA = Brodmann Area; x, y and z coordinates are reported in Montreal Neurological Institute space. Significance threshold was set at  $Z = 2.3$  ( $p < .01$ ), cluster-corrected at  $p < .05$  for the total number of whole-brain voxels..



**Table 5.** Whole-brain Activation During Successful Item Recognition (Hits > Misses) Following Item-specific Encoding in Healthy Comparison Subjects.

| Cluster | Voxels | Z-value | X   | Y   | Z  | Location                      | BA |
|---------|--------|---------|-----|-----|----|-------------------------------|----|
| 1       | 1,375  | 3.85    | -18 | 68  | 6  | Left Superior Frontal Gyrus   | 10 |
|         |        | 3.69    | -30 | 34  | 42 | Left Middle Frontal Gyrus     | 8  |
|         |        | 3.50    | -12 | 70  | 10 | Left Superior Frontal Gyrus   | 10 |
|         |        | 3.46    | -26 | 64  | 4  | Left Superior Frontal Gyrus   | 10 |
|         |        | 3.37    | -22 | 66  | 0  | Left Middle Frontal Gyrus     | 10 |
|         |        | 3.26    | -22 | 62  | 18 | Left Superior Frontal Gyrus   | 10 |
| 2       | 1,002  | 4.03    | -58 | -50 | 40 | Left Inferior Parietal Lobule | 40 |
|         |        | 3.92    | -44 | -70 | 44 | Left Precuneus                | 19 |
|         |        | 3.78    | -38 | -78 | 38 | Left Superior Occipital Gyrus | 19 |
|         |        | 3.69    | -52 | -50 | 48 | Left Inferior Parietal Lobule | 40 |
|         |        | 3.43    | -40 | -70 | 36 | Left Precuneus                | 39 |
|         |        | 3.33    | -44 | -54 | 32 | Left Superior Temporal Gyrus  | 39 |
| 3       | 3,133  | 4.56    | 4   | -70 | 34 | Right Cuneus                  | 7  |
|         |        | 3.74    | 8   | -76 | 48 | Right Precuneus               | 7  |
|         |        | 3.58    | -10 | -62 | 30 | Right Precuneus               | 31 |
|         |        | 3.35    | 14  | -52 | 29 | Right Precuneus               | 31 |
|         |        | 3.34    | 14  | -48 | 32 | Right Precuneus               | 31 |
|         |        | 3.34    | 12  | -42 | 32 | Right Precuneus               | 31 |

**note:** BA = Brodmann Area; x, y and z coordinates are reported in Montreal Neurological Institute space. Significance threshold was set at  $Z = 2.3$  ( $p < .01$ ), cluster-corrected at  $p < .05$  for the total number of whole-brain voxels.

**Table 6.** Whole-brain Activation During Successful Item Recognition (Hits > Misses) Following Relational Encoding in Patients with Schizophrenia.

| Cluster | Voxels | Z-value | X   | Y   | Z   | Location                     | BA |
|---------|--------|---------|-----|-----|-----|------------------------------|----|
| 1       | 1420   | 3.79    | -22 | 7   | -7  | Left Putamen                 | -- |
|         |        | 3.75    | -26 | 4   | -8  | Left Putamen                 | -- |
|         |        | 3.69    | -18 | 6   | -13 | Left Subcallosal Gyrus       | 34 |
|         |        | 3.38    | -35 | 6   | -16 | Left Superior Temporal Gyrus | 38 |
|         |        | 3.24    | -18 | 8   | 11  | Left Putamen                 | -- |
|         |        | 3.19    | -14 | -13 | 19  | Left Caudate Body            | -- |
| 2       | 1342   | 3.66    | 16  | 11  | -7  | Right Putamen                | -- |
|         |        | 3.63    | 31  | 0   | 9   | Right Claustrum              | -- |
|         |        | 3.58    | 20  | 11  | -9  | Right Putamen                | -- |
|         |        | 3.46    | 25  | -4  | -13 | Right Amygdala               | -- |
|         |        | 3.41    | 16  | -8  | -13 | Right Parahippocampal Gyrus  | 28 |
|         |        | 3.38    | 16  | -4  | -19 | Right Uncus                  | 34 |
| 3       | 1093   | 3.48    | -5  | -71 | 19  | Left Cuneus                  | 18 |
|         |        | 3.29    | -13 | -58 | 36  | Left Precuneus               | 7  |
|         |        | 2.86    | -3  | -56 | 36  | Left Precuneus               | 7  |
|         |        | 2.85    | 6   | -49 | 38  | Right Precuneus              | 7  |
|         |        | 2.76    | -3  | -78 | 11  | Left Cuneus                  | 17 |
|         |        | 2.75    | -9  | -60 | 28  | Left Precuneus               | 31 |

**note:** BA = Brodmann Area; x, y and z coordinates are reported in Montreal Neurological Institute space. Significance threshold was set at  $Z = 2.3$  ( $p < .01$ ), cluster-corrected at  $p < .05$  for the total number of whole-brain voxels.

**Table 7.** Whole-brain Activation During Successful Item Recognition (Hits > Misses) Following Item-Specific Encoding in Patients with Schizophrenia.

| Cluster | Voxels | Z-value | X   | Y   | Z  | Location                      | BA |
|---------|--------|---------|-----|-----|----|-------------------------------|----|
| 1       | 1028   | 3.37    | -30 | -72 | 42 | Left Precuneus                | 19 |
|         |        | 3.12    | -54 | -50 | 32 | Left Supramarginal Gyrus      | 40 |
|         |        | 3.11    | -47 | -51 | 47 | Left Inferior Parietal Lobule | 40 |
|         |        | 2.99    | -45 | -55 | 45 | Left Inferior Parietal Lobule | 40 |
|         |        | 2.94    | -43 | -64 | 37 | Left Angular Gyrus            | 39 |
|         |        | 2.92    | -51 | -54 | 28 | Left Supramarginal Gyrus      | 40 |
| 2       | 1758   | 3.63    | 10  | -79 | 36 | Right Cuneus                  | 19 |
|         |        | 3.31    | -1  | -58 | 25 | Left Cingulate Gyrus          | 31 |
|         |        | 3.25    | -1  | -57 | 39 | Left Precuneus                | 7  |
|         |        | 3.2     | 1   | -48 | 18 | Right Posterior Cingulate     | 30 |
|         |        | 3.18    | -3  | -73 | 49 | Left Precuneus                | 7  |
|         |        | 3.11    | 0   | -81 | 36 | Left Cuneus                   | 19 |

**note:** BA = Brodmann Area; x, y and z coordinates are reported in Montreal Neurological Institute space. Significance threshold was set at  $Z = 2.3$  ( $p < .01$ ), cluster-corrected at  $p < .05$  for the total number of whole-brain voxels.
